# Supplementary material for: Targeting Cardiovascular Diseases by Flavonols: An Update
Source: MDPI journal article supplement (doi:10.3390/nu14071439), 2022-03-30
Supplement: s1 [file s1]

# Targeting Cardiovascular Diseases by Flavonols: An Update

Aleksandra Kozłowska <sup>1</sup> and Dorota Szostak-Węgierek <sup>2,\*</sup>

Table S1. The summary of (A) clinical trials in particular disorders and (B) meta-analyses.

| A. Clinical trials in particular disorders |                                                                 |                                 |                                                       |                                                                    |                                                        |                          |                                                                                                                                                                                                                                                                                                                                               |                                                                                                                                                                                                                                                                                       |                                                                                                          |
|--------------------------------------------|-----------------------------------------------------------------|---------------------------------|-------------------------------------------------------|--------------------------------------------------------------------|--------------------------------------------------------|--------------------------|-----------------------------------------------------------------------------------------------------------------------------------------------------------------------------------------------------------------------------------------------------------------------------------------------------------------------------------------------|---------------------------------------------------------------------------------------------------------------------------------------------------------------------------------------------------------------------------------------------------------------------------------------|----------------------------------------------------------------------------------------------------------|
| Study (year)                               | Study Design and Comparator (if applicable)                     | Number of participants          | Drug/Substance                                        | Dosage [mg/d]                                                      | Condition                                              | Treatment/ use duration  | Endpoints/Measures                                                                                                                                                                                                                                                                                                                            | Outcomes                                                                                                                                                                                                                                                                              | Limitations                                                                                              |
| ENDOTHELIAL FUNCTION                       |                                                                 |                                 |                                                       |                                                                    |                                                        |                          |                                                                                                                                                                                                                                                                                                                                               |                                                                                                                                                                                                                                                                                       |                                                                                                          |
| Bondonno (2018) [73]                       | a randomized, controlled cross-over trial                       | 30                              | low flavonoid apple, LFA vs high flavonoid apple, HFA | 195.3 mg of quercetin daily, Cripps Pink apple extract             | individuals at risk for cardiovascular diseases (CVDs) | Acute effects or 4 weeks | <ul style="list-style-type: none"> <li>endothelial function assessed using flow-mediated dilation (FMD) of the brachial artery</li> <li>blood pressure (BP)</li> <li>arterial stiffness</li> </ul>                                                                                                                                            | <ul style="list-style-type: none"> <li>significant increase in FMD acutely (0.8%) and after 4 weeks chronic intake (0.5%), and in plasma flavonoid metabolites after HFA</li> <li>higher FMD response compared with the placebo</li> </ul>                                            | it was not feasible for participants to be blinded to the treatment they were receiving                  |
| Bondonno (2020) [74]                       | a randomized, controlled, cross-over trial                      | 25 aged between 50 and 70 years | EMIQ®, Enzymatically modified isoquercitrin,          | 4.89 mg EMIQ® (2 mg aglycone equivalent)/kg body weight vs placebo | participants with at least one CVDs risk factor        | Acute effects            | <ul style="list-style-type: none"> <li>endothelial function</li> <li>BP</li> <li>arterial stiffness</li> <li>cognitive function</li> <li>oxidative stress</li> <li>markers of nitric oxide (NO) production</li> </ul>                                                                                                                         | <ul style="list-style-type: none"> <li>plasma concentrations of quercetin metabolites were significantly higher after EMIQ® treatment</li> </ul>                                                                                                                                      | small sample size                                                                                        |
| Brüll (2017a) [91]                         | a randomized, double-blind, placebo-controlled, crossover trial | 22                              | quercetin from onion skin extract                     | 54 mg of quercetin vs placebo                                      | overweight and obese adults with hypertension          | Acute effects            | <ul style="list-style-type: none"> <li>metabolic and vascular responses</li> <li>BP</li> <li>reactive hyperemia index (RHI)</li> <li>high-sensitive C-reactive protein (hs-CRP)</li> <li>soluble endothelial-derived adhesion molecules</li> <li>parameters of lipid and glucose metabolism</li> <li>markers of antioxidant status</li> </ul> | <ul style="list-style-type: none"> <li>Postprandial metabolic responses induced by the challenge, such as lipemia and insulinemia, were not attenuated by the concomitant ingestion of quercetin</li> <li>no acute effects of quercetin on markers of endothelial function</li> </ul> | time points at which endpoints were measured may not be representative of the entire postprandial period |
| CARDIOVASCULAR RISK FACTORS                |                                                                 |                                 |                                                       |                                                                    |                                                        |                          |                                                                                                                                                                                                                                                                                                                                               |                                                                                                                                                                                                                                                                                       |                                                                                                          |
| Asadi (2019) [79]                          | a randomized, double-blind, trial                               | 62                              | <i>Melissa officinalis</i> L. (lemon balm) extract    | 700-mg hydroalcoholic extract of <i>M. officinalis</i> /daily      | patients with T2DM                                     | 12 weeks                 | <ul style="list-style-type: none"> <li>cardiovascular risk factors</li> <li>glycemic control</li> </ul>                                                                                                                                                                                                                                       | <ul style="list-style-type: none"> <li>reduction in fasting blood glucose level, hemoglobin A1c</li> </ul>                                                                                                                                                                            | small sample size, using lower dosage                                                                    |

|                           |                                                                 |     |                                                                                    |                     |                                                |         |                                                                                                                                                                                                                             |                                                                                                                                                                                                                                                                                                                             |                                                                                                                                                                                                                                                                                                      |                                          |
|---------------------------|-----------------------------------------------------------------|-----|------------------------------------------------------------------------------------|---------------------|------------------------------------------------|---------|-----------------------------------------------------------------------------------------------------------------------------------------------------------------------------------------------------------------------------|-----------------------------------------------------------------------------------------------------------------------------------------------------------------------------------------------------------------------------------------------------------------------------------------------------------------------------|------------------------------------------------------------------------------------------------------------------------------------------------------------------------------------------------------------------------------------------------------------------------------------------------------|------------------------------------------|
|                           |                                                                 |     |                                                                                    |                     | (type 2 diabetes mellitus)                     |         |                                                                                                                                                                                                                             |                                                                                                                                                                                                                                                                                                                             | (HbA1c) , systolic BP and triglycerides (TG), hs-CRP level                                                                                                                                                                                                                                           | of <i>M. officinalis</i> supplementation |
|                           |                                                                 |     |                                                                                    |                     |                                                |         |                                                                                                                                                                                                                             |                                                                                                                                                                                                                                                                                                                             | <ul style="list-style-type: none"><li>increase in high-density lipoprotein (HDL-c) levels and mean change of paraoxonase-1 (PON1)</li><li>insulin, homeostasis model assessment-insulin resistance (HOMA-IR), and pancreatic <math>\beta</math>-cell function were significantly decreased</li></ul> |                                          |
| Van den Eynde (2018) [93] | a randomized, double-blind, placebo-controlled, crossover trial | 37  | quercetin 3-glucoside, epicatechin or placebo                                      | 160 mg/d<br>100mg/d | healthy (pre)hypertensive men and women        | 4 weeks | <ul style="list-style-type: none"><li>methylglyoxal (MGO)</li><li>advanced glycation end products (AGEs)</li></ul>                                                                                                          | <ul style="list-style-type: none"><li>quercetin treatment reduced MGO by 10.6% from baseline values</li><li>improved the nutritional status</li><li>reduced biomarkers of heart health risk</li></ul>                                                                                                                       | relatively healthy individuals with a short intervention period                                                                                                                                                                                                                                      |                                          |
| Isakov (2018) [94]        | a randomized, double-blind, placebo -controlled trial           | 120 | multivitamin, multi-mineral and phytonutrient supplement which contained quercetin | no data             | population with low fruit and vegetable intake | 8 weeks | <ul style="list-style-type: none"><li>nutritional status (blood levels of <math>\beta</math>-carotene, <math>\alpha</math>-tocopherol, vitamin C, B6, B12, red blood cell, folate, zinc, selenium, and quercetin)</li></ul> | <ul style="list-style-type: none"><li>health risk: serum homocysteine (Hcy), serum gamma-glutamyl transferase (GGT)</li><li>no significant effects on the lipid profile</li><li>no effects on BP</li><li>no effect on HDL-c, apolipoprotein A1, glucose, uric acid, oxidized low-density lipoprotein (oxLDL), CRP</li></ul> | unbalanced gender ratio effects of many substances                                                                                                                                                                                                                                                   |                                          |
| Burak (2019) [92]         | a randomized, double-blind, placebo-controlled, crossover trial | 67  | Alpha-linolenic acid (ALA) and quercetin Vs. ALA+ placebo                          | 3.6 g/d<br>190 mg/d | metabolically healthy men and women            | 8 weeks | <ul style="list-style-type: none"><li>effects on BP and lipid and glucose metabolism</li><li>biomarkers of inflammation, oxidative stress, and antioxidant status</li></ul>                                                 | <ul style="list-style-type: none"><li>both interventions decreased total cholesterol (TC), low-density lipoprotein cholesterol (LDL-c), non-high-density lipoprotein cholesterol, and apolipoprotein B</li></ul>                                                                                                            | the present study population was metabolically healthy combined effects of a macronutrient ALA and a phytochemical (quercetin)                                                                                                                                                                       |                                          |

|                                          |                                                               |     |                                                                   |                                                                                           |                                                                              |           |                                                                                                                                                         |                                                                                                                                                                                                                                                                                                                                                                                                                                                      |                                                                                               |
|------------------------------------------|---------------------------------------------------------------|-----|-------------------------------------------------------------------|-------------------------------------------------------------------------------------------|------------------------------------------------------------------------------|-----------|---------------------------------------------------------------------------------------------------------------------------------------------------------|------------------------------------------------------------------------------------------------------------------------------------------------------------------------------------------------------------------------------------------------------------------------------------------------------------------------------------------------------------------------------------------------------------------------------------------------------|-----------------------------------------------------------------------------------------------|
| Kondratiuk (2018) [83]                   | a randomized, double-blinded, trial                           | 84  | quercetin                                                         | 1000 mg 2 times per day for 6 months, then 500 mg 2 times per day for subsequent 6 months | men with gout and essential hypertension                                     | 12 months | <ul style="list-style-type: none"> <li>echocardiographic parameters of the left ventricular diastolic function</li> </ul>                               | <ul style="list-style-type: none"> <li>no evidence was seen for an additive or synergistic effect of ALA plus quercetin on markers of cardiovascular disease risk.</li> <li>improve echocardiographic parameter of diastolic function left ventricular, purine metabolism, renal function</li> <li>reduction of systolic BP by 5,5% and diastolic BP by 3,6%</li> <li>decreased TC, LDL-c, triglycerides (TG), and fasting plasma glucose</li> </ul> | study conducted only among men                                                                |
| Leyva-Soto (2021) [75]                   | a randomized placebo-controlled trial                         | 156 | enriched bread with epicatechin and quercetin                     | bread with 0.05% of a 1:1 mixture of (-)-epicatechin and quercetin                        | adults who have at least 3 of the risk factors for Metabolic Syndrome (MetS) | 12 weeks  | <ul style="list-style-type: none"> <li>biochemical parameters related to metabolic syndrome</li> <li>genotoxicity in buccal epithelium cells</li> </ul> | <ul style="list-style-type: none"> <li>nuclear abnormalities in buccal epithelium cells also decreased</li> </ul>                                                                                                                                                                                                                                                                                                                                    | flavonoid content significantly decreased during storage                                      |
| Vetrani (2018) [89]                      | a randomized controlled parallel-group trial                  | 78  | intake of polyphenol (PP) subclasses with different types of diet | low PP diet: ~365 mg/ day vs. high PP diet: ~2903 mg/day                                  | participants at high cardiovascular risk                                     | 8 weeks   | <ul style="list-style-type: none"> <li>cardiometabolic risk factors</li> </ul>                                                                          | <ul style="list-style-type: none"> <li>The high flavonol intake was related to decrease in urinary isoprostanes</li> </ul>                                                                                                                                                                                                                                                                                                                           | the effects of a whole diet rich in polyphenols                                               |
| POST-MYOCARDIAL INFRACTION PATIENTS      |                                                               |     |                                                                   |                                                                                           |                                                                              |           |                                                                                                                                                         |                                                                                                                                                                                                                                                                                                                                                                                                                                                      |                                                                                               |
| Dehghani (2021) [84]                     | a randomized, double-blind, placebo-controlled, trial         | 76  | quercetin supplementation                                         | 500 mg/day                                                                                | patients following myocardial infarction (MI)                                | 8 weeks   | <ul style="list-style-type: none"> <li>inflammatory factors,</li> <li>total antioxidant capacity (TAC)</li> <li>quality of life (QOL)</li> </ul>        | <ul style="list-style-type: none"> <li>increased serum total antioxidant capacity (TAC)</li> <li>decreased in TNF-<math>\alpha</math> levels</li> <li>improved insecurity dimension of QOL</li> <li>no effects on interleukin 6 (IL-6), hs-CRP, BP</li> </ul>                                                                                                                                                                                        | lack of measurement of quercetin metabolites in plasma or urine of patients                   |
| SYSTEMIC AND ADIPOSE TISSUE INFLAMMATION |                                                               |     |                                                                   |                                                                                           |                                                                              |           |                                                                                                                                                         |                                                                                                                                                                                                                                                                                                                                                                                                                                                      |                                                                                               |
| Brüll (2017b) [90]                       | a randomized double-blind, placebo-controlled crossover trial | 68  | quercetin from onion skin extract                                 | 162 mg/d                                                                                  | overweight and obese adults with pre- and stage 1 hypertension               | 6 weeks   | <ul style="list-style-type: none"> <li>biomarkers of inflammation, leptin, adiponectin, glucose and insulin levels</li> </ul>                           | <ul style="list-style-type: none"> <li>no effects on serum concentrations of leptin and adiponectin, Homeostasis model assessment-</li> </ul>                                                                                                                                                                                                                                                                                                        | only measured total serum adiponectin and not the potentially more biologically relevant high |

|                                                 |                                               |                                    |                               |                                                                                                                                                 |                                                                                                       |                                      | <ul style="list-style-type: none"> <li>safety of daily quercetin supplementation</li> </ul>                                                                                    | adiponectin (HOMA-AD) or the ratios of leptin/adiponectin and adiponectin/leptin. <ul style="list-style-type: none"> <li>No effects on hsCRP and plasma tumor necrosis factor alpha (TNF-<math>\alpha</math>)</li> </ul>                                                                 | molecular weight adiponectin concentration                                                                                                 |
|-------------------------------------------------|-----------------------------------------------|------------------------------------|-------------------------------|-------------------------------------------------------------------------------------------------------------------------------------------------|-------------------------------------------------------------------------------------------------------|--------------------------------------|--------------------------------------------------------------------------------------------------------------------------------------------------------------------------------|------------------------------------------------------------------------------------------------------------------------------------------------------------------------------------------------------------------------------------------------------------------------------------------|--------------------------------------------------------------------------------------------------------------------------------------------|
| STATIN-INTOLERANT HYPERCHOLESTEROLEMIC PATIENTS |                                               |                                    |                               |                                                                                                                                                 |                                                                                                       |                                      |                                                                                                                                                                                |                                                                                                                                                                                                                                                                                          |                                                                                                                                            |
| Mazza (2020) [76]                               | an open-label randomized single-center study  | 96                                 | Colenorm Cardio               | 3 mg of monacolin-K, 100mg of quercetin, 50mg of berberine hydrochloride, 20mg of t-resveratrol, 50 mcg of chromium, and 5.25mg of black pepper | hypertensive and hypercholesterolemic patients with moderate-to-high CV risk                          | 12 weeks                             | <ul style="list-style-type: none"> <li>lipid profile</li> </ul>                                                                                                                | <ul style="list-style-type: none"> <li>decrease in the TC (-25.9%) and LDL-c levels (-38.7%)</li> <li>No changes in TG and HDL-c</li> </ul>                                                                                                                                              | single center combined effects of many substances                                                                                          |
| VENOUS DISEASE                                  |                                               |                                    |                               |                                                                                                                                                 |                                                                                                       |                                      |                                                                                                                                                                                |                                                                                                                                                                                                                                                                                          |                                                                                                                                            |
| Yildiz (2017) [95]                              | A randomized controlled trial                 | 60                                 | Venoruton                     | 500 mg O-(b-Hydroxyethyl)-rutosides, twice a day                                                                                                | patients with calf muscle pump dysfunction                                                            | until removal of the cast, 6–8 weeks | <ul style="list-style-type: none"> <li>incidence of venous system disease</li> </ul>                                                                                           | <ul style="list-style-type: none"> <li>reducing the incidence of reflux in the below-knee superficial veins</li> </ul>                                                                                                                                                                   | lack of histopathologic examination of vascular structures                                                                                 |
| B. META-ANALYSES                                |                                               |                                    |                               |                                                                                                                                                 |                                                                                                       |                                      |                                                                                                                                                                                |                                                                                                                                                                                                                                                                                          |                                                                                                                                            |
| Study (year)                                    | Study Design and Comparator                   | Number of trials (subjects)        | Drug/Substance                | Dosage [mg/d]                                                                                                                                   | Condition                                                                                             | Treatment/use duration               | Endpoints/Measures                                                                                                                                                             | Outcomes                                                                                                                                                                                                                                                                                 | Limitations                                                                                                                                |
| Micek (2021) [71]                               | Meta-analysis of prospective cohort studies   | 39 studies (1 501 645 individuals) | dietary flavonoids subclasses | the highest versus the lowest category of flavonoids subclasses intake                                                                          | subject from United States, Europe, Asia and Australia                                                | n/a                                  | <ul style="list-style-type: none"> <li>dietary intake of total, subclasses and individual flavonoids and risk of cardiovascular disease</li> </ul>                             | <ul style="list-style-type: none"> <li>intake of quercetin is linearly associated with lower risk of coronary heart diseases (CHD), the lowest risk was observed for up to 12–14 mg day<sup>-1</sup></li> <li>increasing intake of flavonols is inversely associated with CHD</li> </ul> | result based on risk estimates extracted from observational population studies, which do not allow to fully assess a cause-effect relation |
| Huang (2020) [81]                               | Meta-analysis of randomized controlled trials | 17 trials (896 subjects)           | quercetin                     | the dosage of quercetin ranged from 30 mg/d to 1000 mg/d                                                                                        | healthy patients, patients with rheumatoid arthritis, hypertension, prehypertension, prehypertension, | 2-12 weeks                           | <ul style="list-style-type: none"> <li>effect on plasma lipid concentrations</li> <li>effects on blood pressure and glucose concentrations</li> <li>clinical safety</li> </ul> | <ul style="list-style-type: none"> <li>decreased BP supplementation for 8 weeks or more showed significantly increased levels of HDL-c and decreased levels of TG</li> </ul>                                                                                                             | relatively heterogeneous populations                                                                                                       |
